# Supplementary material
Source: HighWire-hosted journal article supplement (https://www.jrheum.org/highwire/filestream/43090/field_highwire_adjunct_files/0/220423DataSuppl.pdf)
Supplement: 220423DataSuppl.pdf [file 220423DataSuppl.pdf]

## SUPPLEMENTARY TABLES

**Supplementary Table 1.** Number of cases with a serum IgG4 level above varying thresholds.

| Serum IgG4 Threshold       | n (%)      |
|----------------------------|------------|
| >1x ULN and $\leq$ 2x ULN  | 2159 (6.7) |
| >2x ULN and $\leq$ 3x ULN  | 475 (1.5)  |
| >3x ULN and $\leq$ 4x ULN  | 150 (0.5)  |
| >4x ULN and $\leq$ 5x ULN  | 57 (0.2)   |
| >5x ULN and $\leq$ 10x ULN | 112 (0.3)  |
| >10x ULN or above assay    | 86 (0.3)   |

ULN = upper limit of normal. A total of 32,206 cases had serum IgG subclasses tested between January 1, 2005 and January 1, 2021.

**Supplementary Table 2.** Characteristics of probable, atypical, and possible IgG4-RD cases.

|                                        | <b>Total Cohort<br/>(n = 15)</b> | <b>Stanford Cohort<br/>(n = 4)</b> | <b>Mass General<br/>Brigham Cohort<br/>(n = 11)</b> |
|----------------------------------------|----------------------------------|------------------------------------|-----------------------------------------------------|
| Age, median [IQR]                      | 67 [54, 71]                      | 55 [46, 64]                        | 68 [60, 71]                                         |
| Sex, n (%)                             |                                  |                                    |                                                     |
| Female                                 | 8 (53)                           | 2 (50)                             | 6 (55)                                              |
| Male                                   | 7 (47)                           | 2 (50)                             | 5 (45)                                              |
| Race/Ethnicity, n (%)                  |                                  |                                    |                                                     |
| White                                  | 4 (27)                           | 0 (0)                              | 4 (36)                                              |
| Black                                  | 1 (7)                            | 0 (0)                              | 1 (9)                                               |
| Hispanic*                              | 1 (7)                            | 1 (25)                             | 0 (0)                                               |
| Asian                                  | 5 (33)                           | 0 (0)                              | 2 (18)                                              |
| Unknown                                | 3 (20)                           | 3 (75)                             | 3 (27)                                              |
| Other                                  | 2 (13)                           | 1 (25)                             | 1 (9)                                               |
| BMI, mean (SD)                         |                                  |                                    |                                                     |
| <25 kg/m <sup>2</sup> , n (%)          | 6 (40)                           | 2 (50)                             | 4 (36)                                              |
| 25-29.9 kg/m <sup>2</sup> , n (%)      | 5 (33)                           | 0 (0)                              | 5 (45)                                              |
| ≥30 kg/m <sup>2</sup> , n (%)          | 4 (27)                           | 2 (50)                             | 2 (18)                                              |
| Unknown, n (%)                         | 0 (0)                            | 0 (0)                              | 0 (0)                                               |
| Smoking, n (%)                         |                                  |                                    |                                                     |
| Never                                  | 9 (60)                           | 3 (75)                             | 6 (55)                                              |
| Former                                 | 5 (33)                           | 1 (25)                             | 4 (36)                                              |
| Current                                | 0 (0)                            | 0 (0)                              | 0 (0)                                               |
| Unknown                                | 1 (7)                            | 0 (0)                              | 1 (9)                                               |
| Atopic disease, n (%)                  | 5 (33)                           | 3 (75)                             | 2 (18)                                              |
| Sinusitis, n (%)                       | 3 (20)                           | 1 (25)                             | 2 (18)                                              |
| Receiving allergy immunotherapy, n (%) | 0 (0)                            | 0 (0)                              | 0 (0)                                               |

IgG4 = immunoglobulin G4; ULN = upper limit of normal; IQR = interquartile range; BMI = body mass index.

\*Ethnicity is recorded separately from race in the Stanford cohort, and thus cases may appear twice in this column.

**Supplementary Table 3.** Pathology findings for probable, atypical, and possible IgG4-RD cases.

| Case    | Classification | Total Points | Classification Features                                                                                                                                    | Pathology Findings                                                                                                                                                                                                  |
|---------|----------------|--------------|------------------------------------------------------------------------------------------------------------------------------------------------------------|---------------------------------------------------------------------------------------------------------------------------------------------------------------------------------------------------------------------|
| Case 1  | Atypical       | N/A          | Breast lesion with biopsy-proven IgG4-RD, serum IgG4 > 5x ULN.                                                                                             | Breast biopsy with dense fibroinflammatory infiltrate with elevated IgG4+ plasma cells.                                                                                                                             |
| Case 2  | Atypical       | N/A          | Mesentery and breast mass, both biopsied and consistent with IgG4-RD, serum IgG4 > 5x ULN.                                                                 | Mesenteric mass and L axillary lymph node. Biopsy showed elevated IgG4+ plasma cells and fibrosis.                                                                                                                  |
| Case 3  | Possible       | 15           | Lymph node with supportive features, serum IgG4 > 5x ULN.                                                                                                  | L iliac lymph node biopsy showed reactive follicular hyperplasia with numerous IgG4+ plasma cells.                                                                                                                  |
| Case 4  | Possible       | 15           | Lymph node with supportive features, serum IgG4 > 5x ULN.                                                                                                  | L supraclavicular lymph node showed sinus histiocytosis and increased IgG4+ plasma cells.                                                                                                                           |
| Case 5  | Possible       | 15           | Lymph node with supportive features, serum IgG4 > 5x ULN.                                                                                                  | L cervical lymph node showed follicular hyperplasia, capsular fibrosis, and increased IgG4+ plasma cells.                                                                                                           |
| Case 6  | Probable       | 15           | Lacrimal gland enlargement with lymphoplasmacytic infiltrate (4 points) and serum IgG4 > 5x ULN.                                                           | R lacrimal gland showed few IgG4+ plasma cells.                                                                                                                                                                     |
| Case 7  | Probable       | 15           | Remote history of pancreatitis (pathology unavailable). Pharyngeal mass. Lymphadenopathy with fibrosis, lymphoplasmacytic infiltrate. Serum IgG4 > 5x ULN. | R submandibular lymph node showed reactive follicular and paracortical lymphoid hyperplasia with increased IgG4+ plasma cells.                                                                                      |
| Case 8  | Probable       | 17           | Bilateral lacrimal gland enlargement with serum IgG4 > 5x ULN.                                                                                             | Right axillary lymph node showed reactive lymphoid hyperplasia.                                                                                                                                                     |
| Case 9  | Probable       | 11           | Pancreas biopsy with chronic pancreatitis and atrophy, CT with biliary strictures, serum IgG4 > 5x ULN.                                                    | Pancreas biopsy showed chronic pancreatitis with atrophy, no tumor seen. Bile duct with no tumor seen. Gallbladder with acute and chronic inflammation. Liver with portal inflammation and bile duct proliferation. |
| Case 10 | Probable       | 19           | CT showed renal pelvis thickening and soft tissue, serum IgG4 > 5x ULN.                                                                                    | Kidney biopsy showed features of membranous nephropathy.                                                                                                                                                            |
| Case 11 | Probable       | 19           | Clinical pancreatitis with diffuse pancreatic enlargement on CT and serum IgG4 > 5x ULN.                                                                   | No pathology.                                                                                                                                                                                                       |
| Case 12 | Probable       | 19           | Marked periaortic and periliac stranding which extends to involve the mesentery and retroperitoneum in the abdomen and serum IgG4 > 5x ULN.                | No pathology.                                                                                                                                                                                                       |
| Case 13 | Probable       | 11           | Pulmonary mass with serum IgG4 > 5x ULN, never biopsied, then developed large coronary aneurysms.                                                          | No pathology.                                                                                                                                                                                                       |
| Case 14 | Probable       | 19           | Classic retroperitoneal fibrosis with circumferential soft tissue around the infrarenal aorta and serum IgG4 > 5x ULN.                                     | No pathology.                                                                                                                                                                                                       |
| Case 15 | Probable       | 17           | Bilateral lacrimal gland enlargement with serum IgG4 > 5x ULN.                                                                                             | No pathology.                                                                                                                                                                                                       |

IgG4 = immunoglobulin G4; IgG4-RD = IgG4-related disease.

**Supplementary Table 4.** Characteristics of IgG4-RD cases with a serum IgG4 level >5x ULN.

| <b>IgG4-RD Patient Characteristics</b>    | <b>n (%)</b> |
|-------------------------------------------|--------------|
| Age, median [IQR]                         | 67 [57, 75]  |
| Sex, n (%)                                |              |
| Female                                    | 36 (25)      |
| Male                                      | 108 (75)     |
| Race/Ethnicity, n (%)                     |              |
| White                                     | 79 (54.9)    |
| Black                                     | 8 (5.6)      |
| Hispanic*                                 | 7 (4.9)      |
| Asian                                     | 38 (26.4)    |
| Unknown                                   | 8 (5.6)      |
| Other                                     | 9 (6.3)      |
| BMI, mean (SD)                            | 26.8 (5.8)   |
| Number of organs involved, median [IQR]   | 3 [2.0, 4.0] |
| Single-organ involvement**                | 16 (11.1)    |
| Multi-organ involvement                   | 128 (88.9)   |
| Lacrimal gland                            | 48 (33.8)    |
| Salivary gland                            | 71 (50.0)    |
| Orbital                                   | 25 (17.6)    |
| Pancreas                                  | 73 (51.4)    |
| Biliary                                   | 34 (23.9)    |
| Liver                                     | 14 (9.9)     |
| Renal                                     | 44 (31.0)    |
| Retroperitoneal fibrosis                  | 13 (9.2)     |
| Aorta/large vessel                        | 9 (6.3)      |
| Total IgG, elevated (n = 105)             | 93 (88.6)    |
| IgG1, elevated (n = 130)                  | 54 (41.5)    |
| IgG2, elevated (n = 132)                  | 49 (37.1)    |
| IgG3, elevated (n = 130)                  | 39 (30.0)    |
| IgE, elevated (n = 84)                    | 65 (77.4)    |
| AEC, above 500 k/uL (n = 111)             | 43 (38.7)    |
| ESR, elevated (n = 81)                    | 52 (64.2)    |
| CRP, elevated (n = 80)                    | 31 (38.8)    |
| SPEP or UPEP, abnormal (n = 63)           | 6 (9.5)      |
| Kappa:lambda FLC ratio, elevated (n = 33) | 18 (54.5)    |

ULN = upper limit of normal; IgG4 = immunoglobulin G4; IgG4-RD = IgG4-related disease;

IQR = interquartile range; IgE = immunoglobulin E; AEC = absolute eosinophil count;

ESR = erythrocyte sedimentation rate; CRP = C-reactive protein; SPEP = serum protein electrophoresis;

UPEP = urine protein electrophoresis; FLC = free light chain.

\*Ethnicity is recorded separately from race in the Stanford cohort, and thus cases may appear twice in this column.

\*\*Single-organ involvement included: pancreas (5), lacrimal gland (2), renal (2), pulmonary (2), lymphadenopathy (2), paraspinal mass (1), breast (1), prostate (1).
